# Supplementary material for: Evaluation of the potential role of long non-coding RNA LINC00961 in luminal breast cancer: a case–control and systems biology study
Source: PubMed Central journal article supplement (PMC7531117; doi:10.1186/s12935-020-01569-1), 2020-10-02
Supplement: 12935_2020_1569_MOESM1_ESM.pdf [file 12935_2020_1569_MOESM1_ESM.pdf]

# Breast

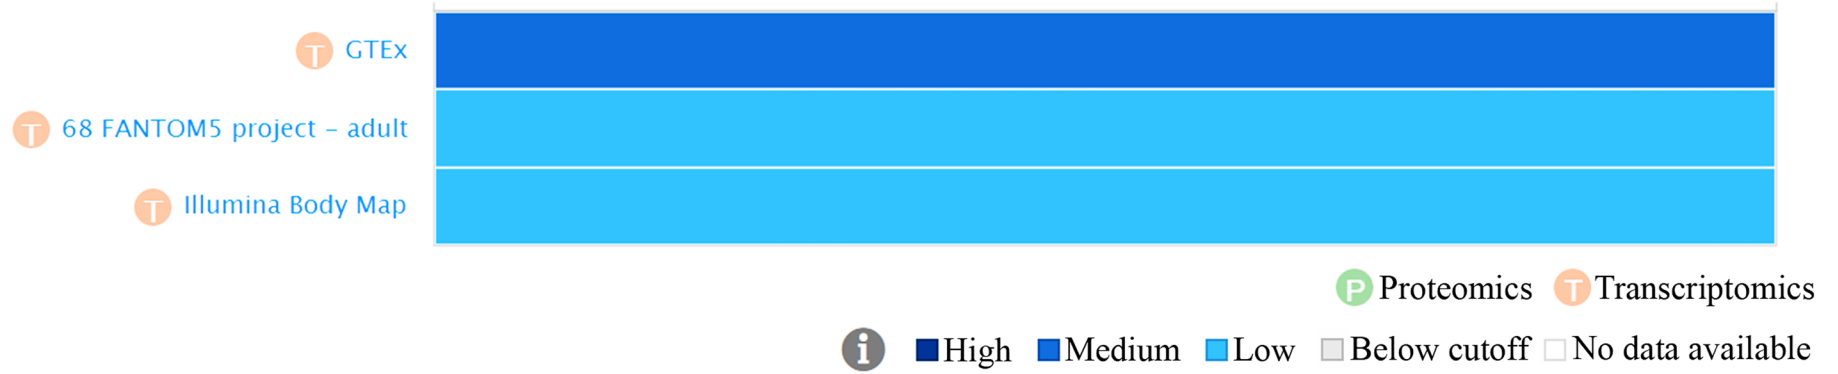

**P** Proteomics **T** Transcriptomics

**i** ■ High ■ Medium ■ Low ■ Below cutoff ■ No data available
